# Supplementary material for: Fatty acid oxidation facilitates DNA double-strand break repair by promoting PARP1 acetylation
Source: PubMed Central journal article supplement (PMC10349888; doi:10.1038/s41419-023-05968-w), 2023-07-15

Figure 1 A

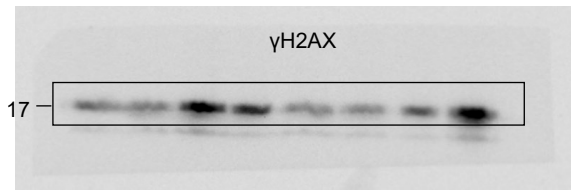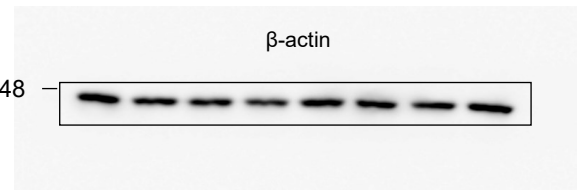

Figure 1 F

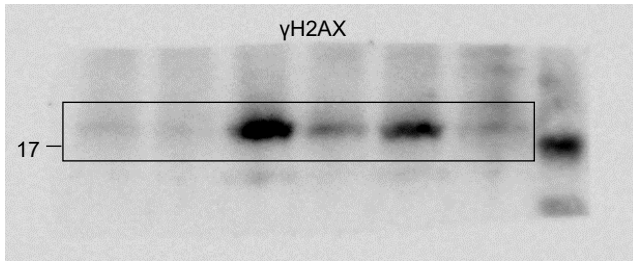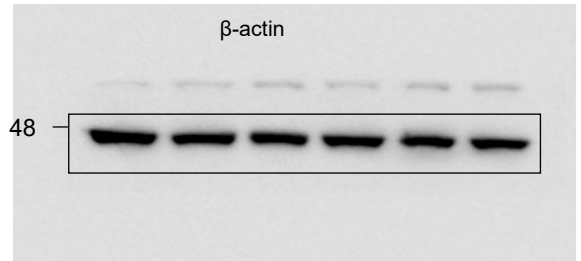

Figure 2 E

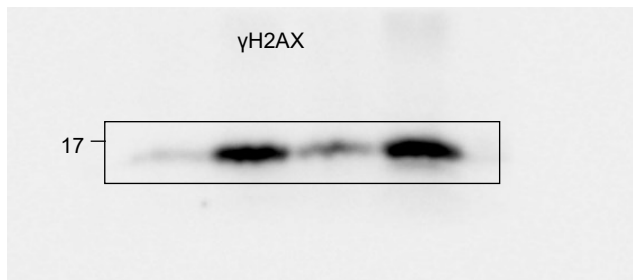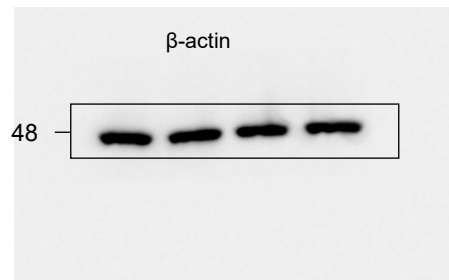

Figure 3 B

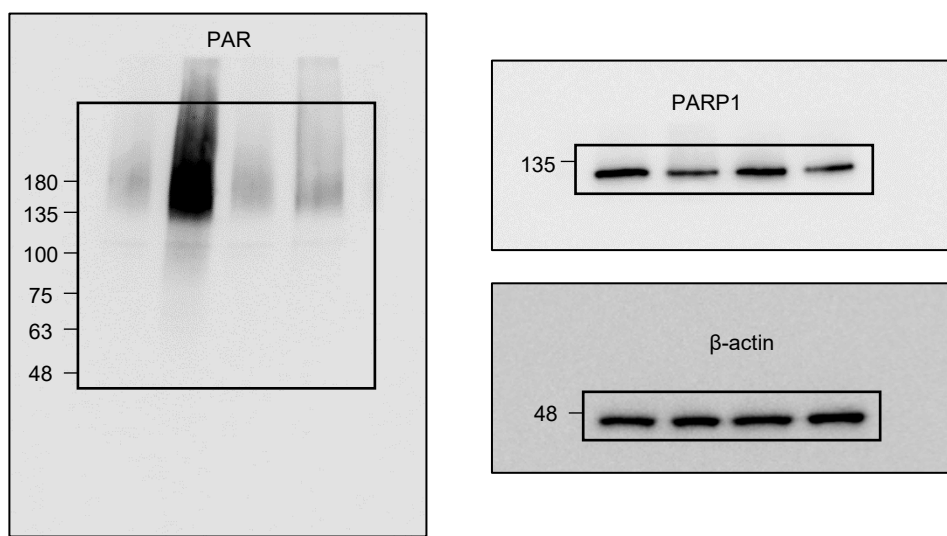

Figure 3 C

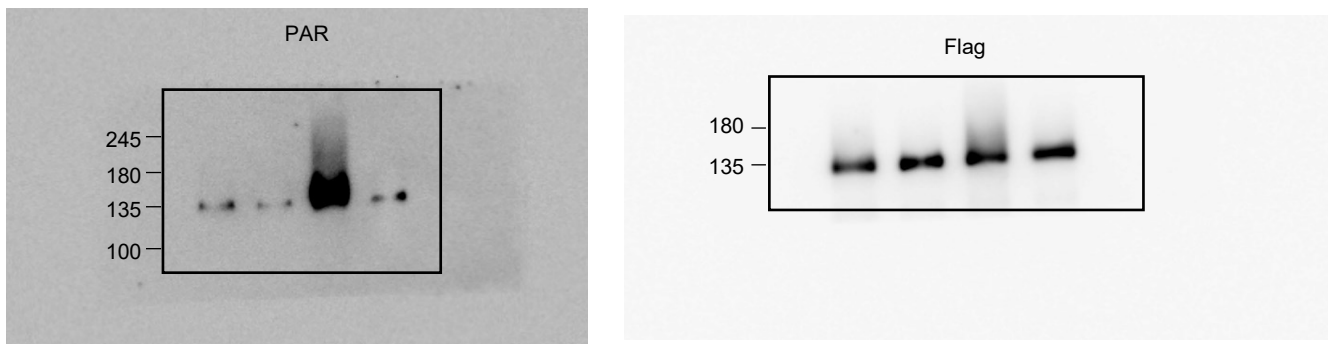

Figure 3 D

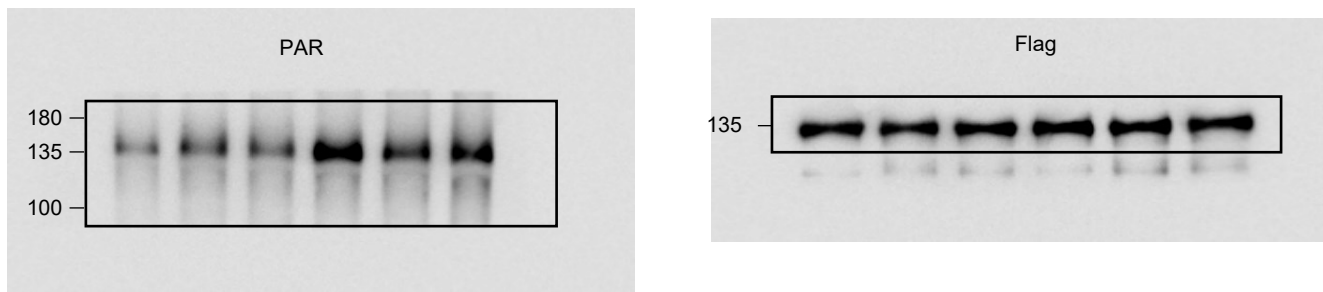

Figure 4 A

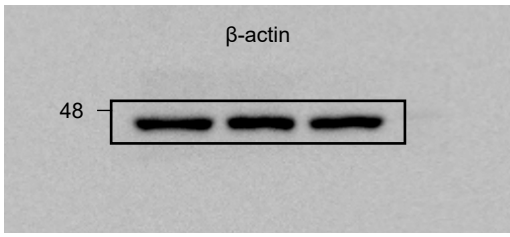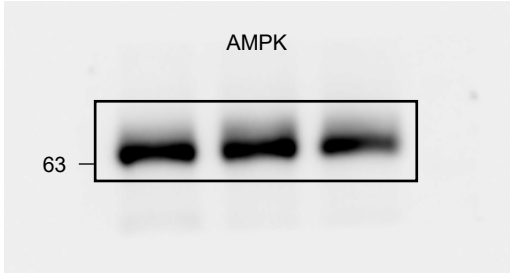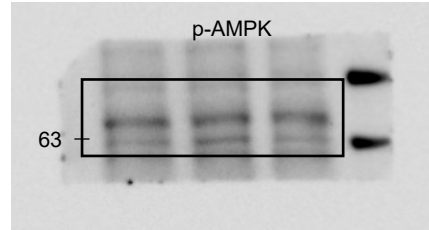

Figure 4 B

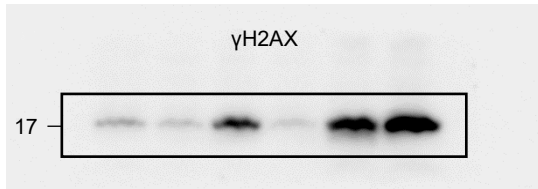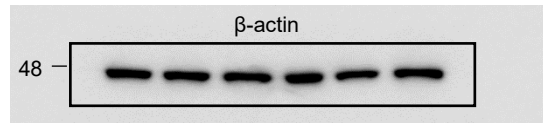

Figure 4 F

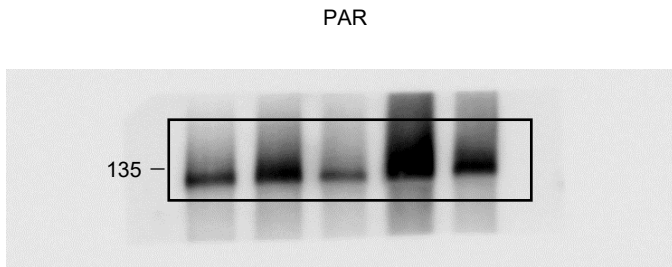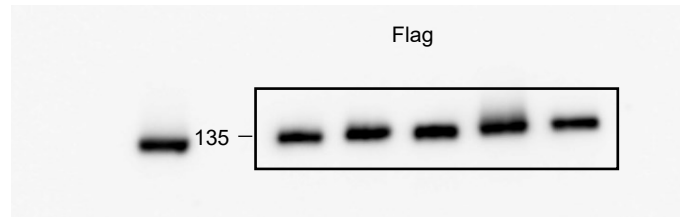

Figure 4 G

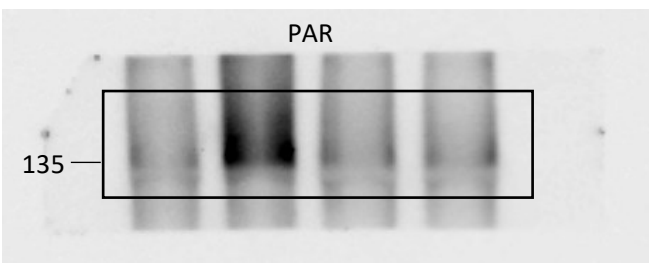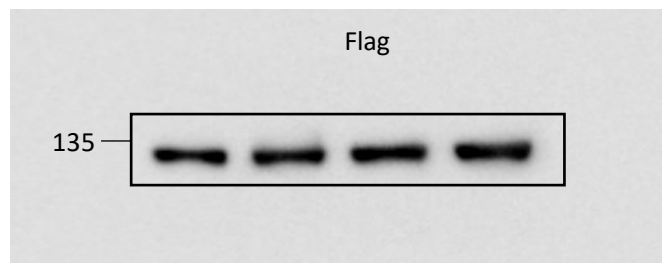

Figure 5 A

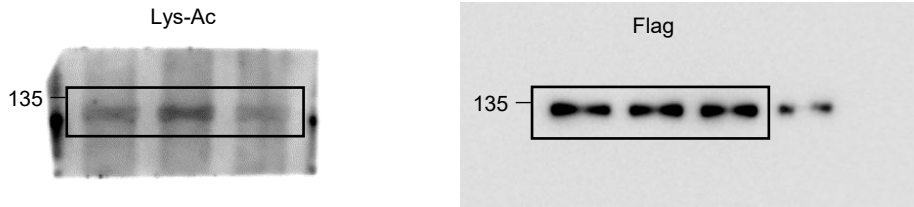

Figure 5 B

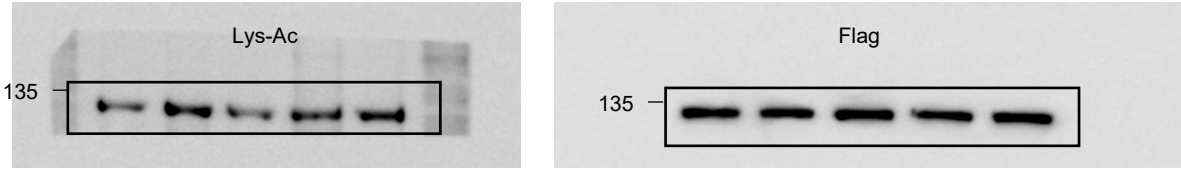

Figure 5 C

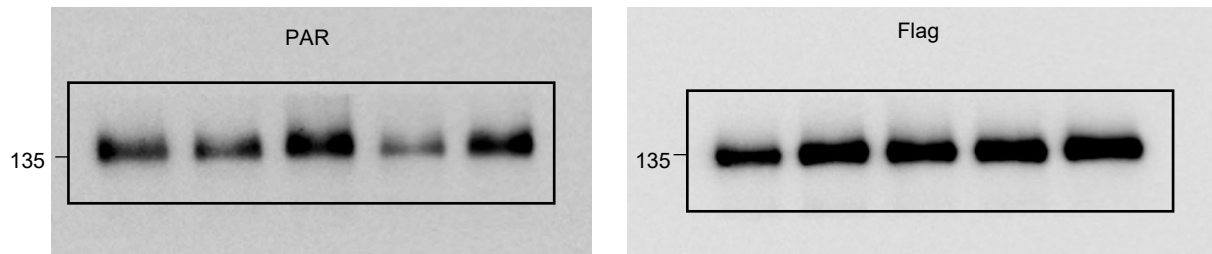

Figure 5 D

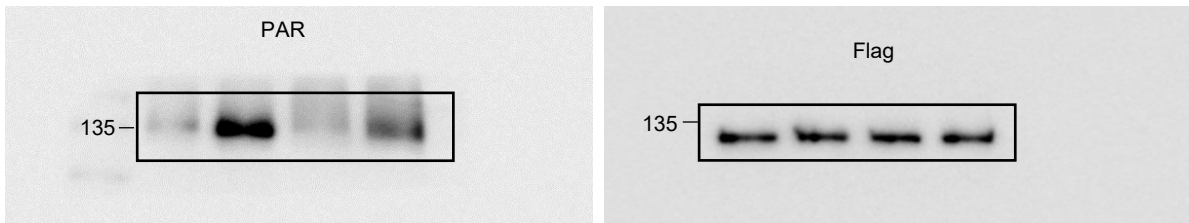

Figure 5 E

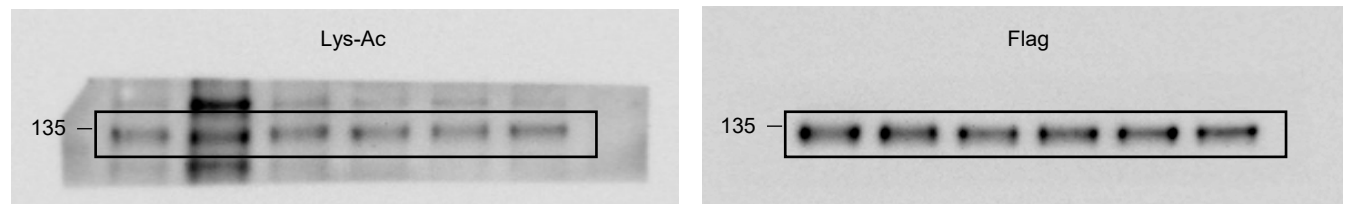

Figure 5 F

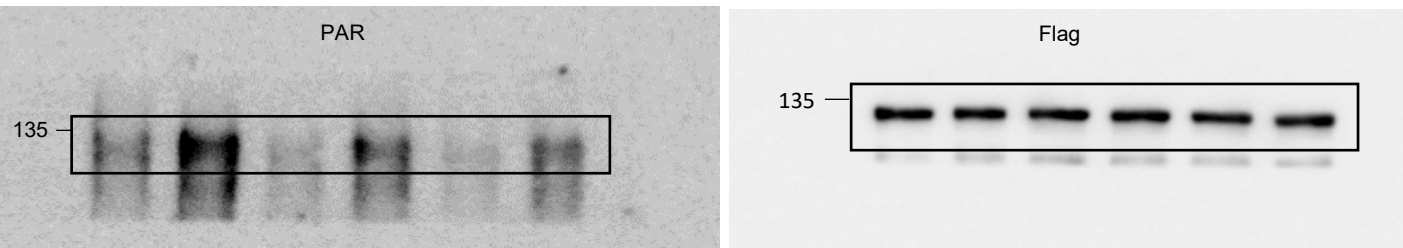

Figure 5 G

PAR

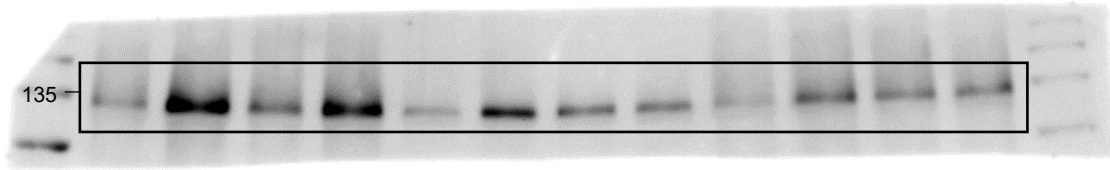

Flag

135

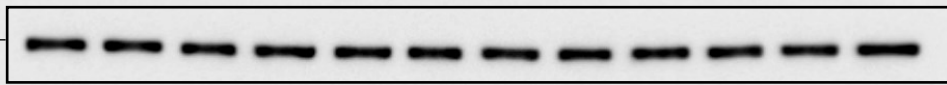

Figure 5 H

$\gamma$ H2AX

17

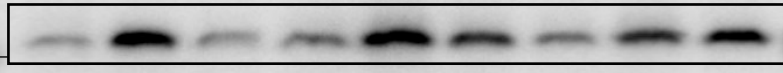

$\beta$ -actin

48

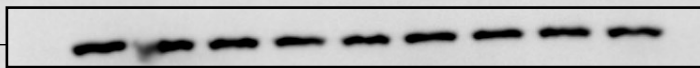

Supplementary Figure 1 C

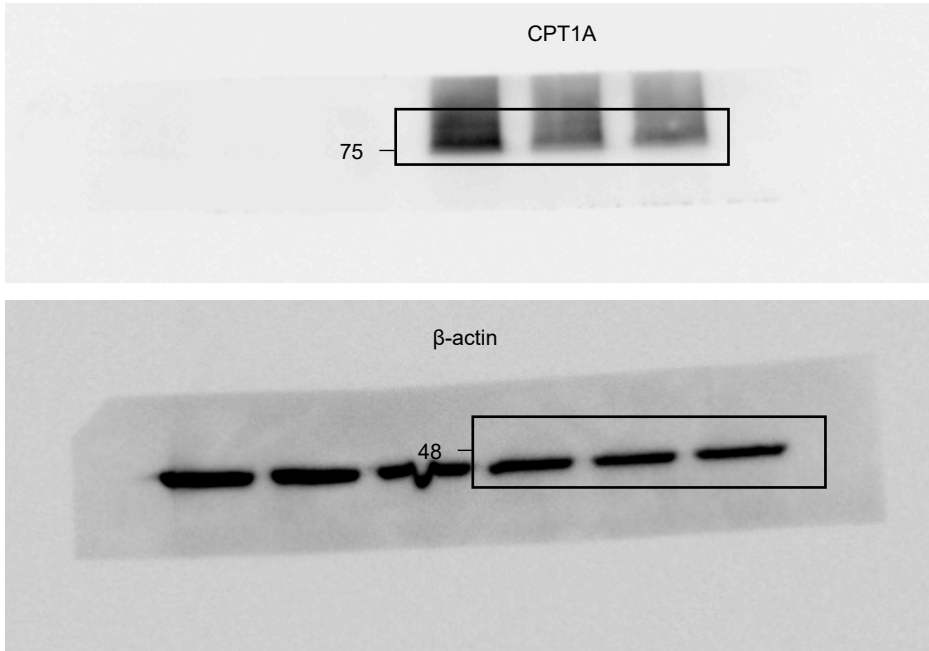

Supplementary Figure 1 D

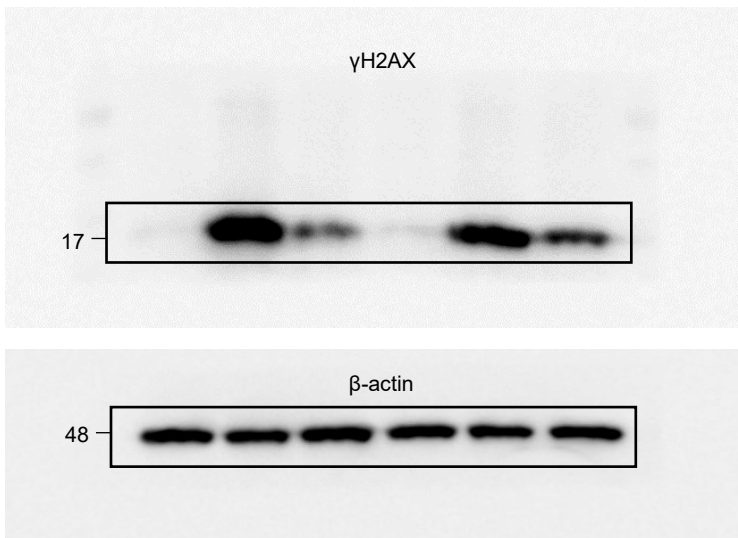

Supplementary Figure 1 E

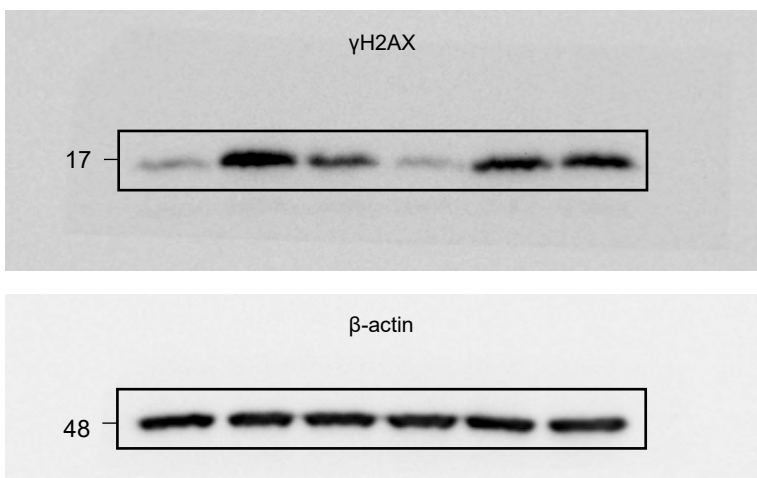

Supplementary Figure 3 C

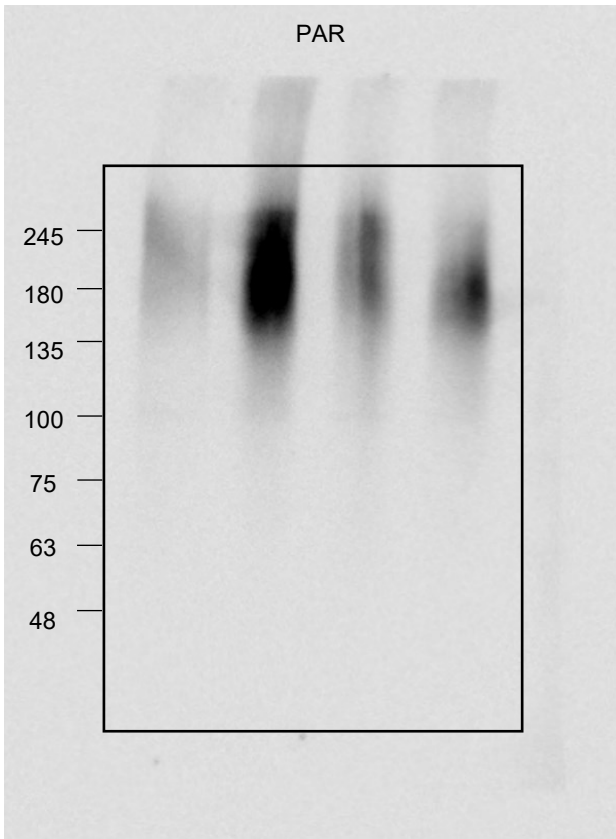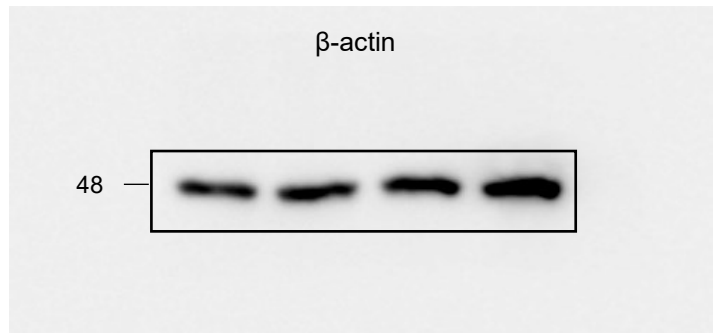

Supplementary Figure 3 D

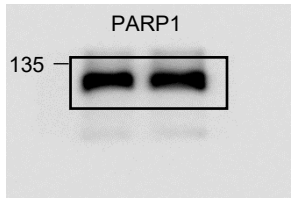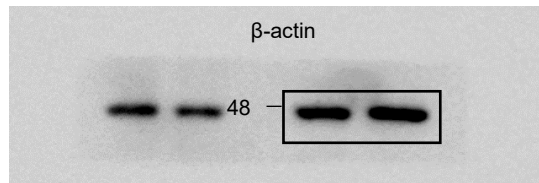

Supplementary Figure 3 E

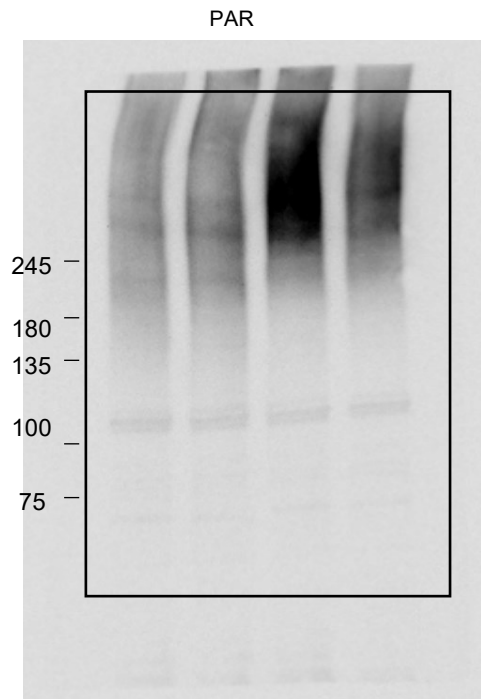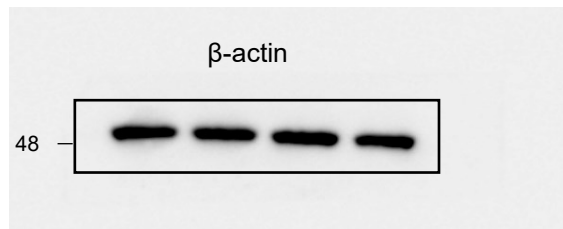

Supplementary Figure 3 F

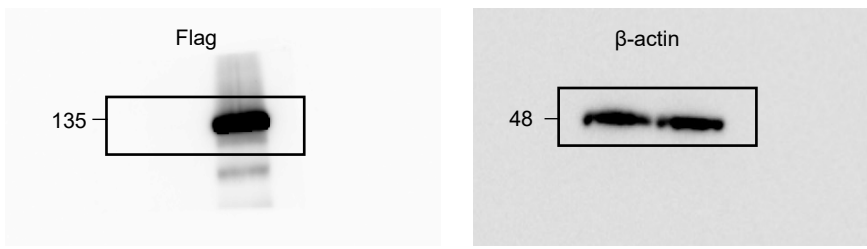

Supplementary Figure 3 G

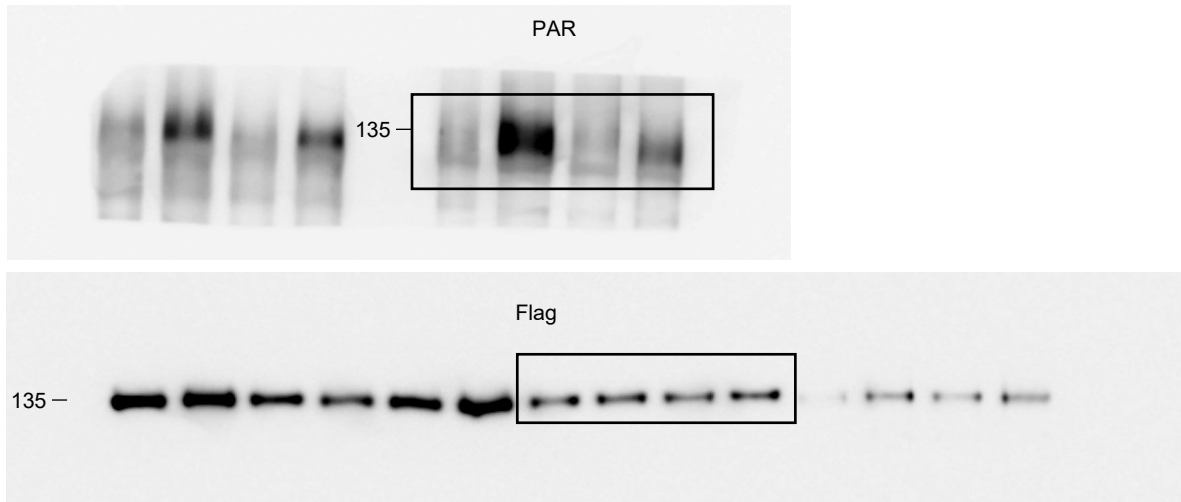

Supplementary Figure 3 H

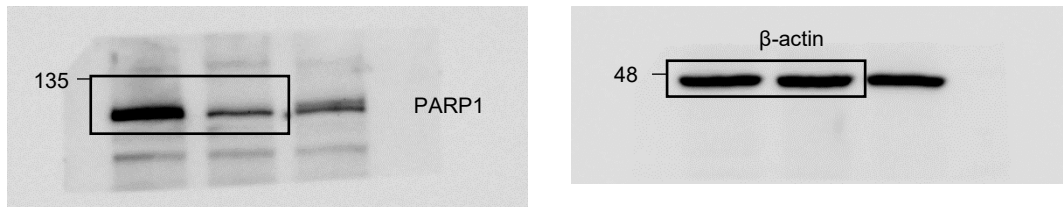



Supplementary Figure 5 A

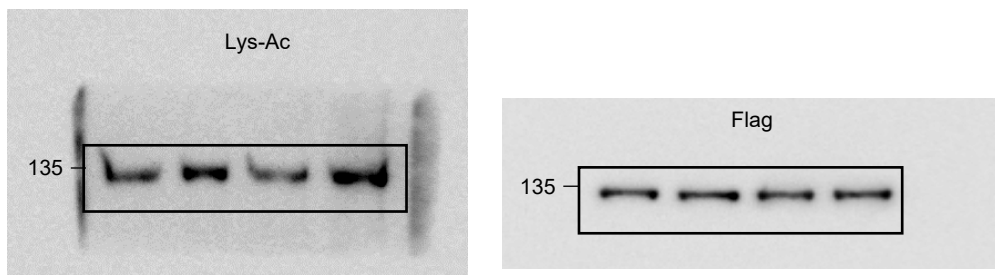

Supplementary Figure 5 B

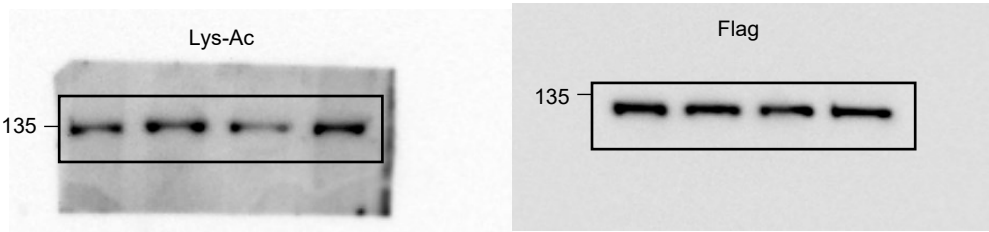

Supplementary Figure 5 C

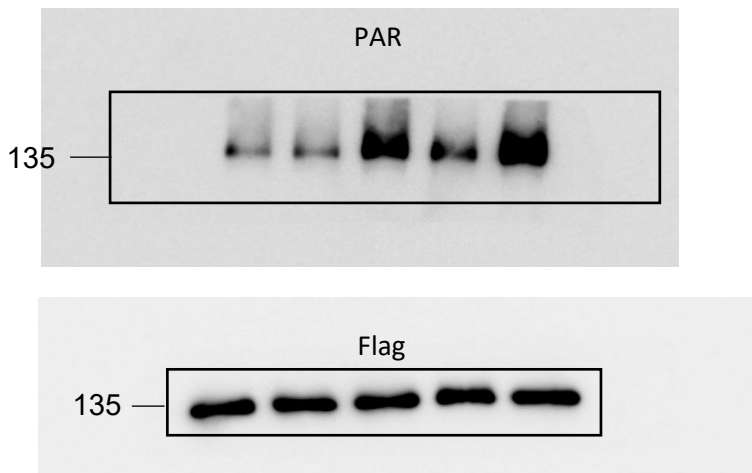

Supplementary Figure 5 E

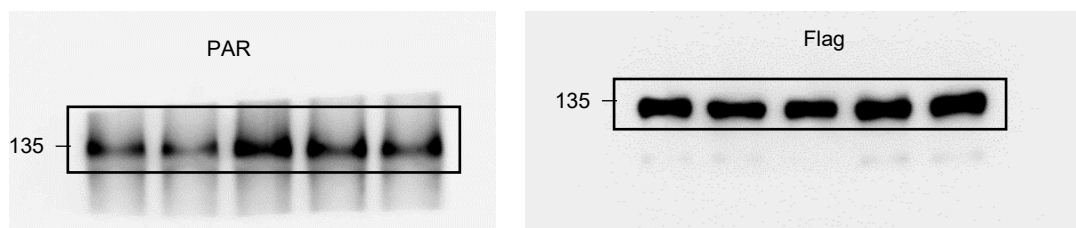

Supplement: 41419_2023_5968_MOESM4_ESM.pdf [file 41419_2023_5968_MOESM4_ESM.pdf]
